# Supplementary material
Source: publisher figshare collection journal article supplement (https://wiley.figshare.com/articles/dataset/_/3558291)
Supplement: Supplementary file 1 [file 1 › appendix-B.htm]

Ecological Archives E095-006-A2


*Ecological Archives* E095-006-A2

Jeffrey D. Muehlbauer, Scott F. Collins, Martin W. Doyle, Klement Tockner. 2014. How wide is a stream? Spatial extent of the potential “stream signature” in terrestrial food webs using meta-analysis. *Ecology* 95:44–55. http://dx.doi.org/10.1890/12-1628.1

Appendix B. Model comparison table and regression coefficients for parameters included in the five best overall stream signature prediction models.

> View / download PDF.


---

[Back to E095-006]
